# Supplementary material for: Substituting inert phosphate with redox-active silicate towards advanced polyanion-type cathode materials for sodium-ion batteries
Source: Royal Society of Chemistry journal article supplement (doi:10.1039/d2nr06602e), 2023-01-01
Supplement: d2nr06602e1.pdf [file d2nr06602e1.pdf]

## Supporting Information For

### **Substituting Innocent Phosphate with Redox-active Silicate Towards Advanced Polyanion-type Cathode Materials for Sodium-ion Batteries**

Ruimin Sun<sup>1</sup>, Mingyue Dou<sup>1</sup>, Yuxiang Zhang<sup>1</sup>, Jingyu Chen<sup>1</sup>, Yuhao Chen<sup>1</sup>, Bo Han<sup>1</sup>,  
Kaisheng Xia<sup>1</sup>, Qiang Gao<sup>1</sup>, Xiaoxiao Liu<sup>2</sup>, Zhao Cai<sup>1,\*</sup>, and Chenggang Zhou<sup>1,\*</sup>

<sup>1</sup> Faculty of Materials Science and Chemistry, China University of Geosciences  
(Wuhan), Wuhan 430074, China

<sup>2</sup> Wuhan National Laboratory for Optoelectronics, Huazhong University of Science and  
Technology, Wuhan 430074, China

\* E-mail: caizhao@cug.edu.cn (Z. Cai); cgzhou@cug.edu.cn (C. Zhou).

## Supplementary Figures

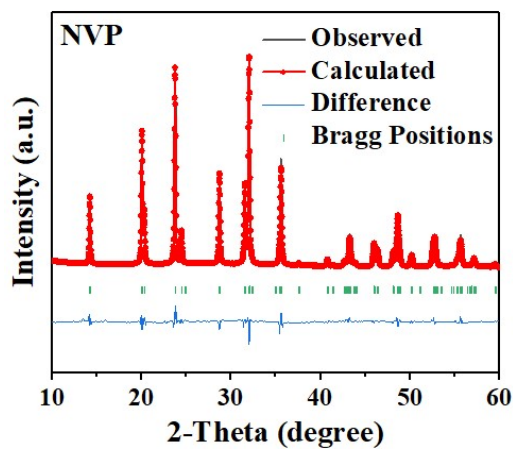

**Figure S1.** XRD Rietveld refinement results of pristine NVP materials.

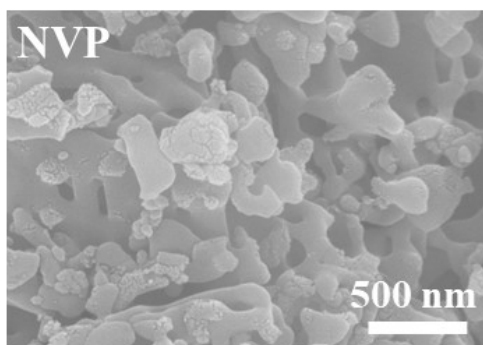

**Figure S2.** SEM image of pristine NVP materials.

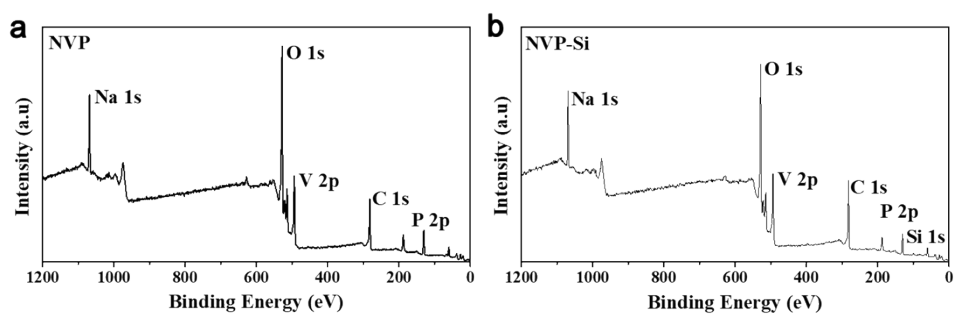

**Figure S3.** XPS full spectra of as-prepared (a) NVP and (b) NVP-Si materials.

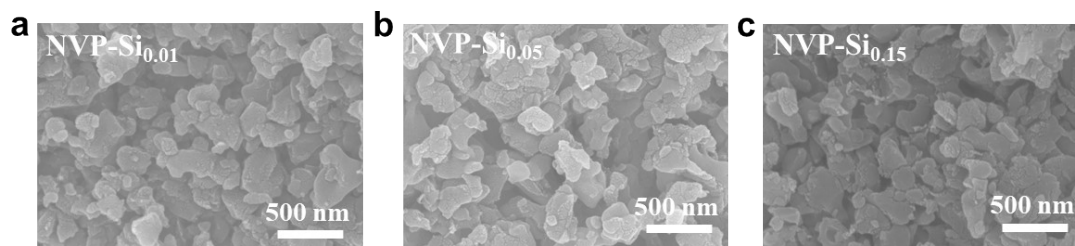

**Figure S4.** SEM images of as-prepared (a)  $\text{Na}_3\text{V}_2(\text{PO}_4)_{2.99}(\text{SiO}_4)_{0.01}$  (i.e. NVP-Si<sub>0.01</sub>), (b)  $\text{Na}_3\text{V}_2(\text{PO}_4)_{2.95}(\text{SiO}_4)_{0.05}$  (i.e. NVP-Si<sub>0.05</sub>), and (c)  $\text{Na}_3\text{V}_2(\text{PO}_4)_{2.85}(\text{SiO}_4)_{0.15}$  (i.e. NVP-Si<sub>0.15</sub>) materials.

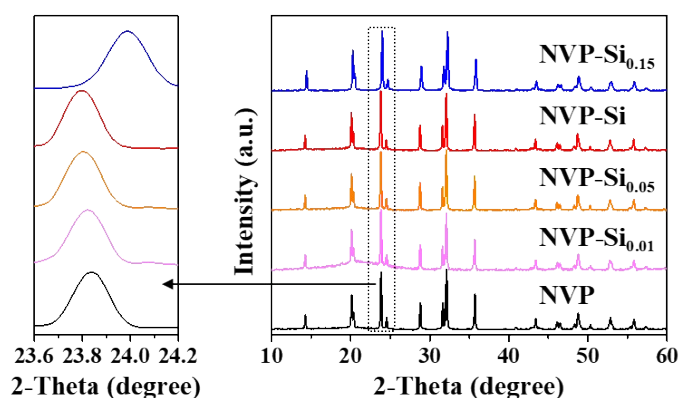

**Figure S5.** XRD patterns of as-prepared NVP, NVP-Si<sub>0.01</sub>, NVP-Si<sub>0.05</sub>, NVP-Si, and NVP-Si<sub>0.15</sub> materials.

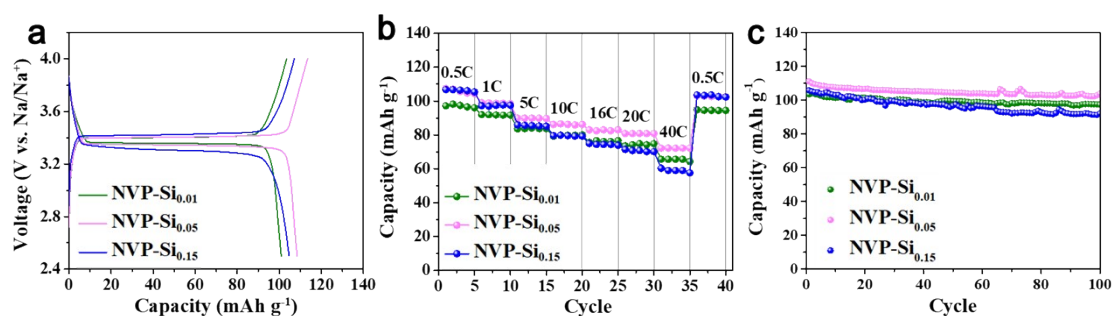

**Figure S6.** (a) Charge/discharge curves at 0.5 C, (b) rate performance from 0.5 C to 40 C, and (c) cycling performance at 0.5 C of the NVP-Si<sub>0.01</sub>, NVP-Si<sub>0.05</sub>, and NVP-Si<sub>0.15</sub> cathodes.

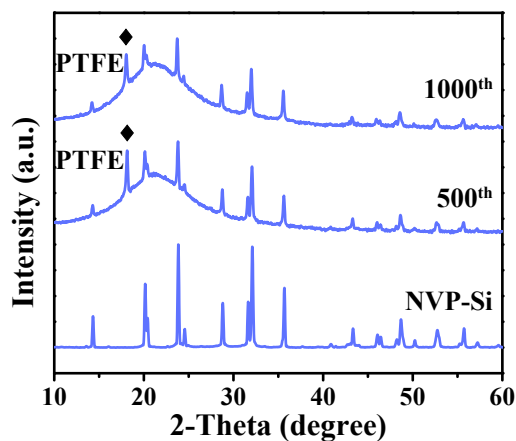

**Figure S7.** The XRD patterns of the NVP-Si cathodes before cycling and after 500/1000 electrochemical cycles at 10 C.

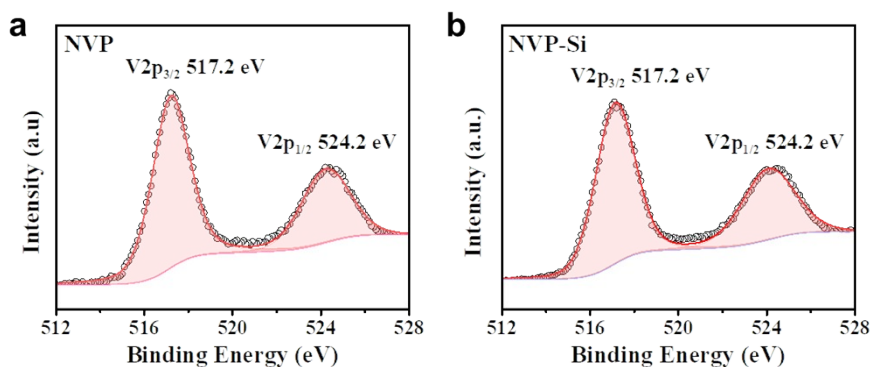

**Figure S8.** The V 2p XPS analysis of the (a) NVP and (b) NVP-Si cathodes.

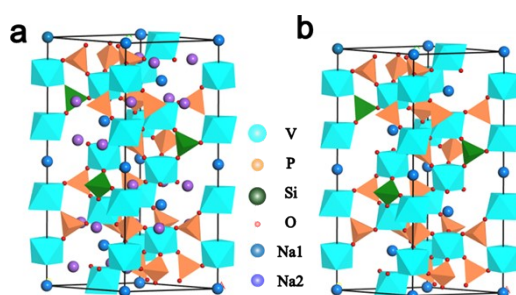

**Figure S9.** Crystal structures of NVP-Si (a) after discharging with a formula of  $\text{Na}_3\text{V}_2(\text{PO}_4)_{2.9}(\text{SiO}_4)_{0.1}$  and (b) after charging with a formula of  $\text{Na}_1\text{V}_2(\text{PO}_4)_{2.9}(\text{SiO}_4)_{0.1}$ .

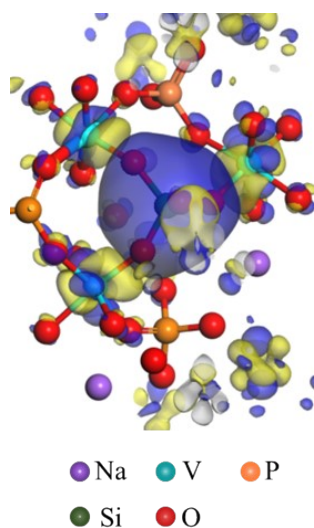

**Figure S10.** Differential charge simulation result of  $\text{Na}_1\text{V}_2(\text{PO}_4)_{2.9}(\text{SiO}_4)_{0.1}$  (i.e. NVP-Si after charging).

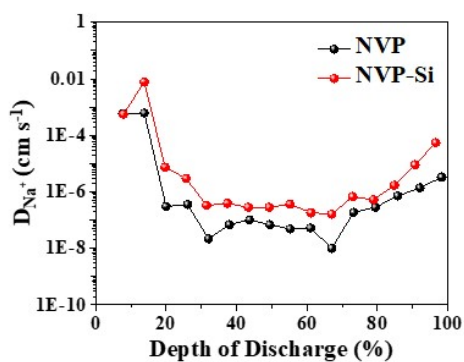

**Figure S11.** Diffusion coefficient of  $\text{Na}^+$  for NVP and NVP-Si cathodes at different depth of discharge based on GITT measurements.

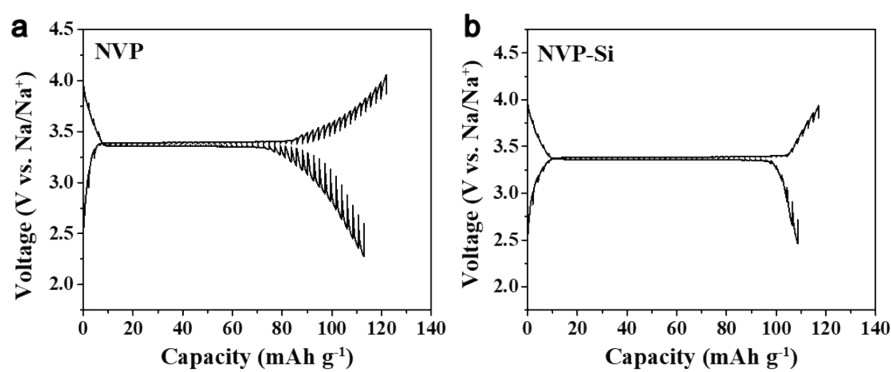

**Figure S12.** GITT measurement results of the (a) NVP and (b) NVP-Si cathodes.

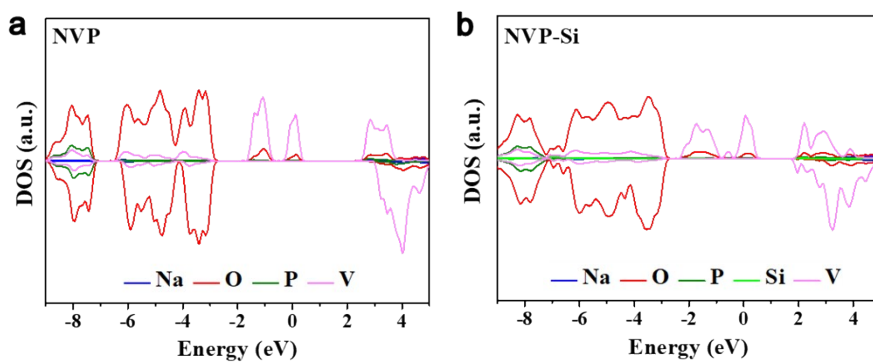

**Figure S13.** Partial density of states for the (a) NVP and (b) NVP-Si materials.

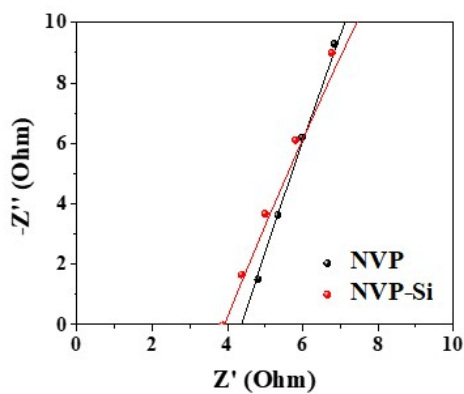

**Figure S14.** Enlarged Nyquist plots of the NVP and NVP-Si cathodes, suggesting the lower solution resistance for NVP-Si.

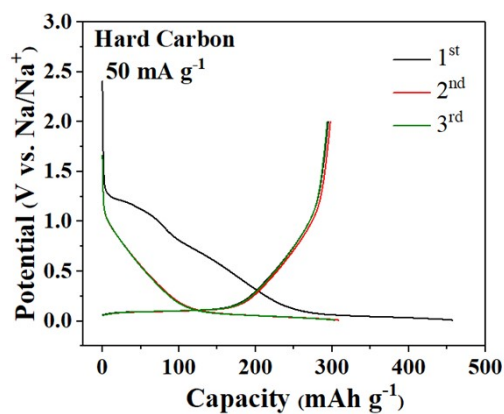

**Figure S15.** Charge/discharge curves of HC anode in sodium cells.

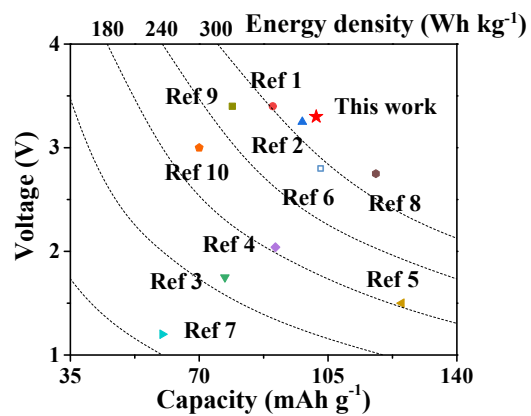

**Figure S16.** The electrochemical performances of the NVP-Si cathode in full cell configuration, compared with the reported NVP-based cathodes in recent publications

## Supplementary Tables

**Table S1.** Comparisons for the refined crystallographic data of NVP and NVP-Si materials based on XRD Rietveld refinement results in **Figure 1b** and **S1**.

|        | Rwp / % | a        | c         | Na1     | Na2     | P-O1/Å     | V-O1/Å     |
|--------|---------|----------|-----------|---------|---------|------------|------------|
| NVP    | 12.1    | 8.722103 | 21.787947 | 0.14844 | 0.34889 | 1.52234(0) | 2.07243(0) |
| NVP-Si | 13.1    | 8.726444 | 21.794979 | 0.16639 | 0.36519 | 1.53839(0) | 2.02566(0) |

**Table S2.** The calculated diffusion activation energy and discharged potentials for NVP and NVP-Si materials.

| Materials         | Energy (eV) | Potential (V) |
|-------------------|-------------|---------------|
| NVP/charged       | -814.585    |               |
| NVP/discharged    | -855.964    | 3.675         |
| NVP-Si/charged    | -814.953    |               |
| NVP-Si/discharged | -857.182    | 3.746         |



## References

- [1] C. Xu, R. Xiao, J. Zhao, F. Ding, Y. Yang, X. Rong, X. Guo, C. Yang, H. Liu, B. Zhong, Y. Hu, *ACS Energy Lett.*, 2022, **7**, 97-107.
- [2] C. Xu, J. Zhao, E. Wang, X. Liu, X. Shen, X. Rong, Q. Zheng, G. Ren, N. Zhang, X. Liu, X. Guo, C. Yang, H. Liu, B. Zhong, Y. Hu, *Adv. Energy Mater.* 2021, **11**, 2100729.
- [3] A. Das, S. B. Majumder, A. Chaudhuri. *J. Power Sources*, 2020, **461**, 228149.
- [4] Y. Subramanian, W. Oh, W. Choi, H. Lee, M. Jeong, R. Thangavel, W. Yoon, *Chem. Eng. J.*, 2021, **403**, 126291.
- [5] Q. Deng, Q. Cheng, X. Liu, C. Chen, Q. Huang, J. Li, W. Zhong, Y. Li, J. Hu, H. Wang, L. Wu, C. Yang, *Chem. Eng. J.*, 2022, **430**, 132710.
- [6] H. Li, L. Peng, Y. Zhu, D. Chen, X. Zhang, G. Yu, *Energy Environ. Sci.*, 2016, **9**, 3399-3405.
- [7] X. Rui, X. Zhang, S. Xu, H. Tan, Y. Jiang, L. Gan, Y. Feng, C. Li, Y. Yu, *Adv. Funct. Mater.* 2021, **32**, 2009458.
- [8] H. Wang, M. Gu, J. Jiang, C. Lai, X. Ai. *J. Power Sources*, 2016, **327**, 653-657.
- [9] B. Peng, Z. Sun, L. Zhao, J. Li, G. Zhang. *Energy storage Mater.*, 2021, **35**, 620-629.
- [10] J. Deng, W. Luo, X. Lu, Q. Yao, Z. Wang, H. Liu, H. Zhou, S. Dou, *Adv. Energy Mater.*, 2017, **8**, 1701610.
